# Supplementary material for: Mesoporous Organosilica Nanoparticles with Tetrasulphide Bond to Enhance Plasmid DNA Delivery
Source: MDPI journal article supplement (doi:10.3390/pharmaceutics15031013), 2023-03-22
Supplement: s1 [file s1]

# Mesoporous Organosilica Nanoparticles with Tetrasulphide Bond to Enhance Plasmid DNA Delivery

Yue Zhang <sup>1</sup>, He Xian <sup>1</sup>, Ekaterina Strounina <sup>2</sup>, Kimberley S. Gunther <sup>3</sup>, Matthew J. Sweet <sup>3</sup>, Chen Chen <sup>4</sup>, Chengzhong Yu <sup>1,\*</sup> and Yue Wang <sup>1,\*</sup>

<sup>1</sup> Australian Institute for Bioengineering and Nanotechnology, The University of Queensland, Brisbane, QLD 4072, Australia; yue.zhang18@uq.net.au (Y.Z.); h.xian@uq.net.au (H.X.)

<sup>2</sup> Centre for Advanced Imaging, The University of Queensland, Brisbane, QLD 4072, Australia; e.strounina@uq.edu.au

<sup>3</sup> Institute for Molecular Bioscience (IMB), IMB Centre for Inflammation and Disease Research, and Australian Infectious Diseases Research Centre, The University of Queensland, Brisbane, QLD 4072, Australia; k.gunther@uq.net.au (K.S.G.); m.sweet@imb.uq.edu.au (M.J.S.)

<sup>4</sup> School of Biomedical Sciences, Faculty of Medicine, The University of Queensland, Brisbane, QLD 4072, Australia; chen.chen@uq.edu.au

\* Correspondence: c.yu@uq.edu.au (C.Y.); yue.wang1@uq.edu.au (Y.W.)

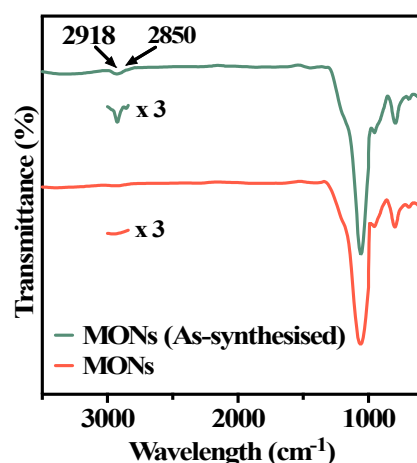

Figure S1. FTIR spectrum for MONs before and after acid extraction.

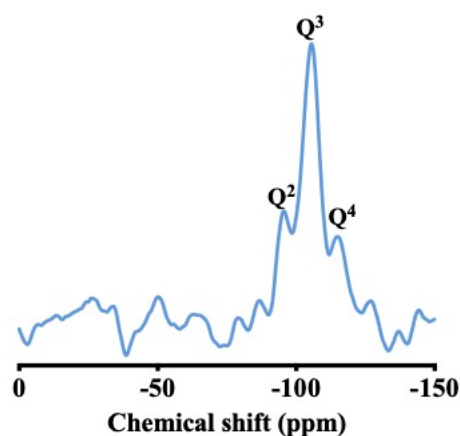

Figure S2. Solid-state <sup>29</sup>Si MAS NMR spectrum of MSNs.

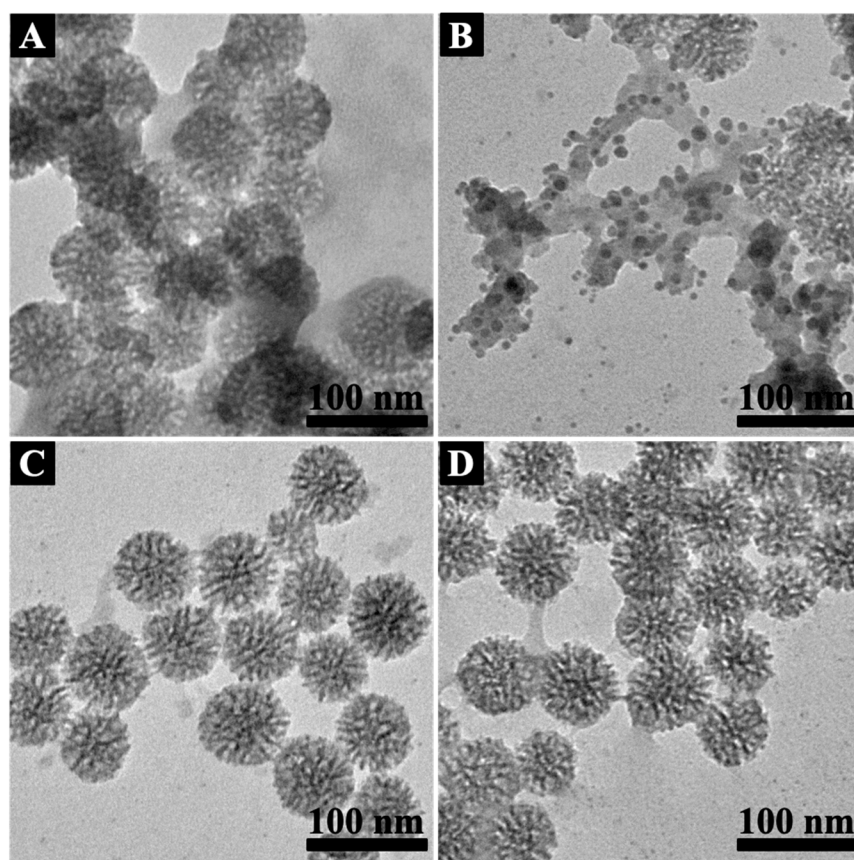

**Figure S3.** Degradation test of MONs (A-B) and MSNs (C-D) tested at 1 mM (A, C) and 10 mM (B, D) GSH solution for 48 h in the presence of serum.

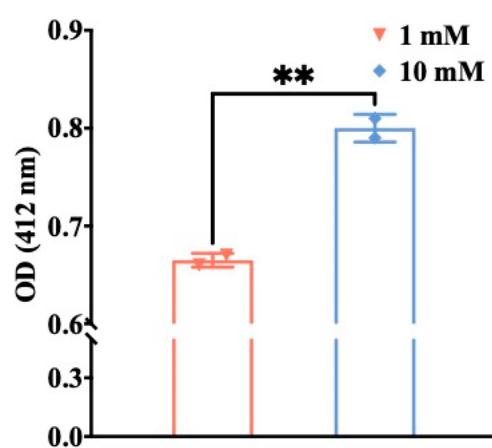

**Figure S4.** Relative quantification of -SH groups (OD 412 nm) after incubation of MONs in 1 mM and 10 mM GSH solution for 48 h in the presence of serum.

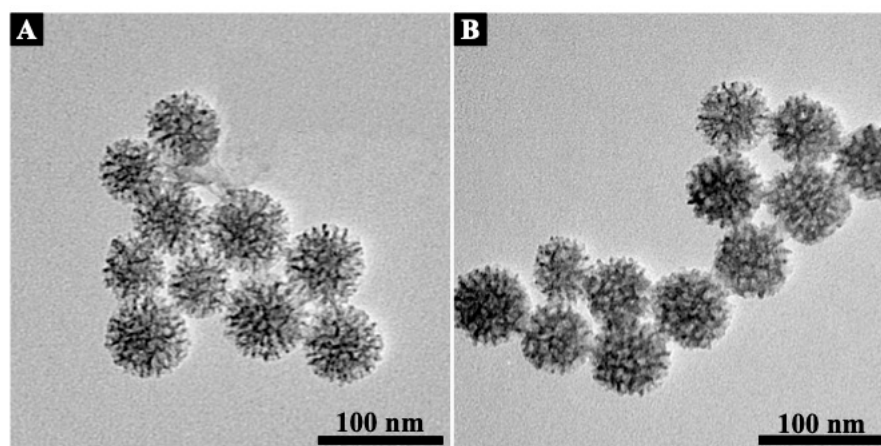

**Figure S5.** TEM images of PEI-MONs (A) and PEI-MSNs (B).

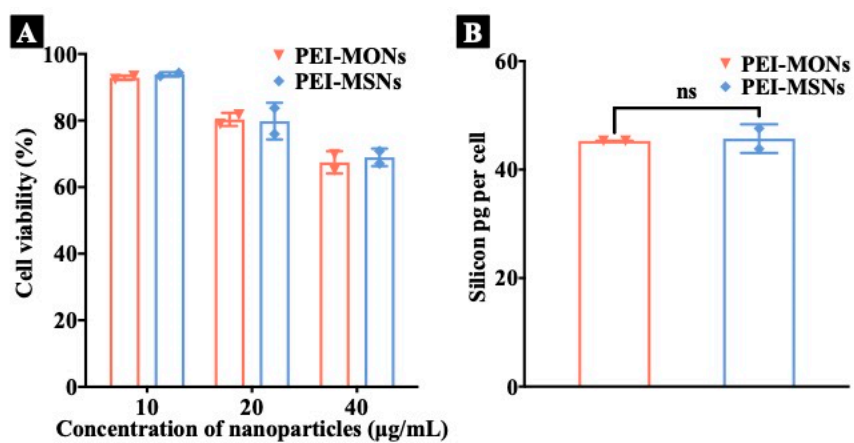

**Figure S6.** (A) Cell viability of DC2.4 cells after incubation with PEI-NPs for 24 h. (B) Cellular uptake of DC2.4 cells incubated with PEI-NPs for 4 h measured by ICP-OES.

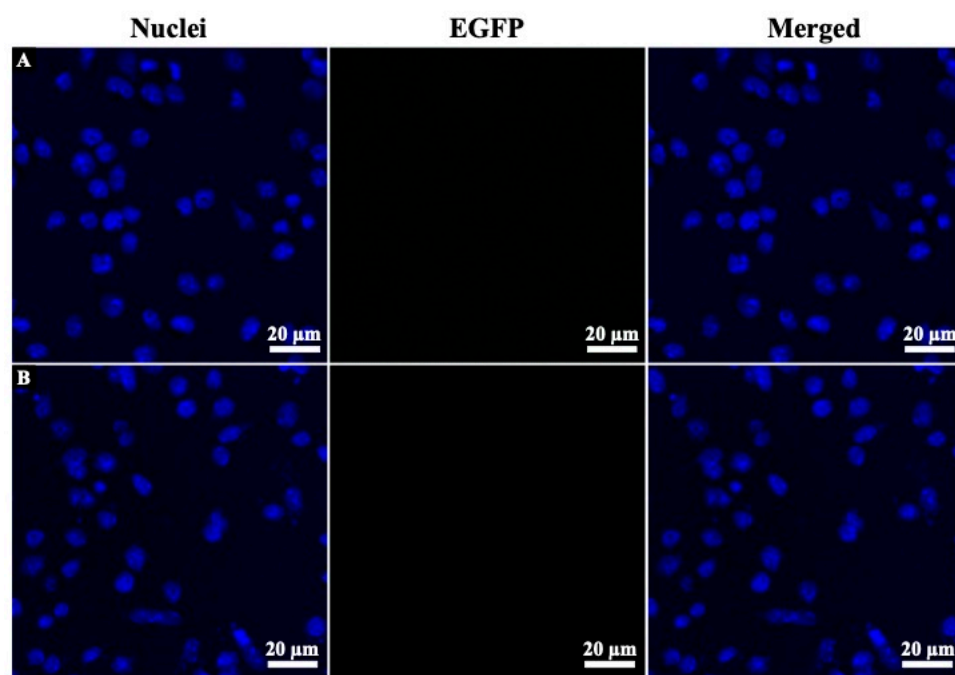

**Figure S7.** Confocal images of DC2.4 cells incubated with PBS (A) and bare EGFP pDNA (B).

**Table S1.** Composition properties of MONs and MSNs before and after PEI modification

| Sample name | Nitrogen (%) | Carbon (%) | Sulphur (%) |
|-------------|--------------|------------|-------------|
| MONs        | 0            | 8.5        | 12.6        |
| MSNs        | 0            | 0          | 0           |
| PEI-MONs    | 5.8          | 19.5       | 9.4         |
| PEI-MSNs    | 5.7          | 12.3       | 0           |
